# Supplementary material
Source: PubMed Central journal article supplement (PMC4385436)
Supplement: NIHMS663014-supplement-2.pdf [file NIHMS663014-supplement-2.pdf]

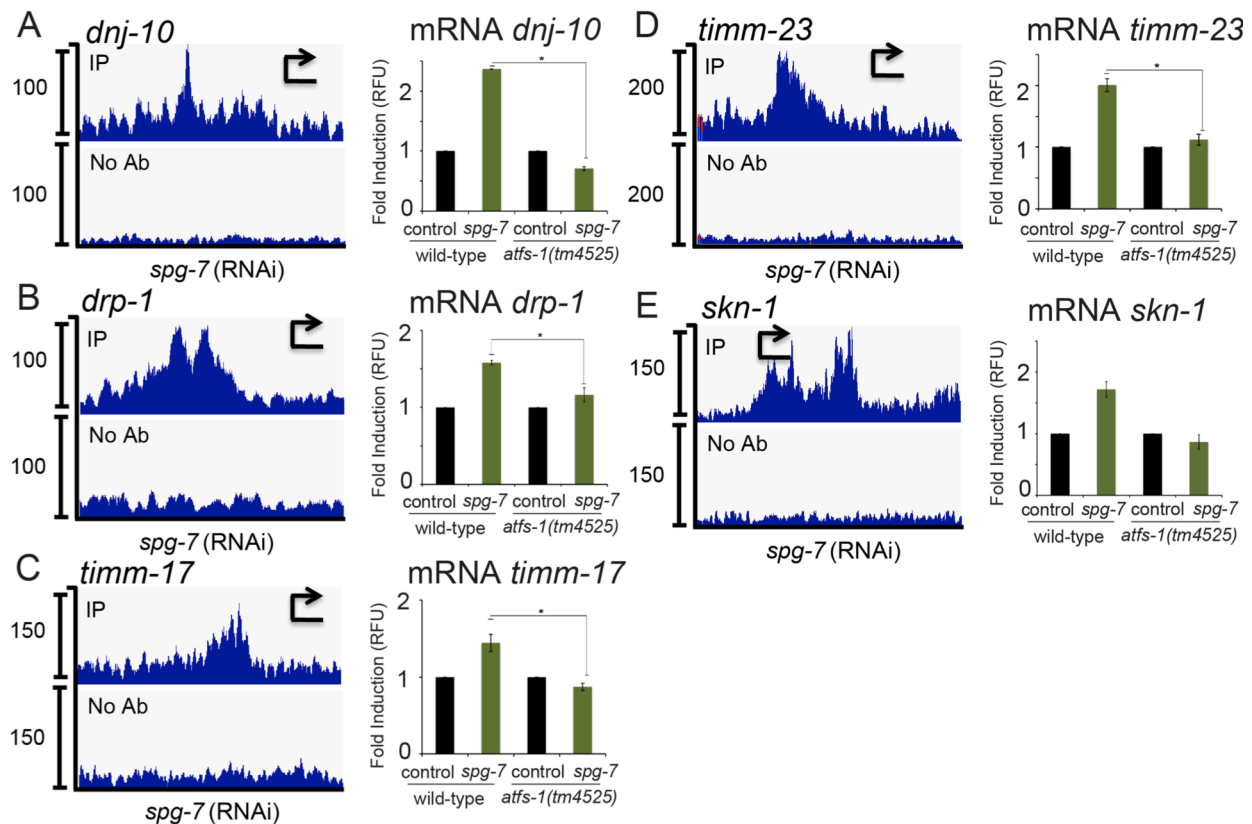

**Figure S1. ATFS-1 interacts with the promoters of mitochondrial-protective genes induced during mitochondrial stress. Related to Figure 1.**

**A-E.** In the left column are ChIP-seq profiles of the *dnj-10*, *drp-1*, *timm-17*, *timm-23*, and *skn-1* promoters in wild-type worms raised on *spg-7*(RNAi), using ATFS-1-specific antibody (upper panel) or no antibody (lower panel). The y-axis is the number of sequence reads and the x-axis is approximately 2.5 kilobases with the start codon marked with an arrowhead. In the right column are the corresponding expression levels of *dnj-10*, *drp-1*, *timm-17*, *timm-23*, and *skn-1* mRNA in wild-type or *atfs-1(tm4525)* worms raised on control or *spg-7*(RNAi) determined by qRT-PCR (N = 3,  $\pm$  SD,  $p^*$  (student t-test) < 0.05) (right panels).

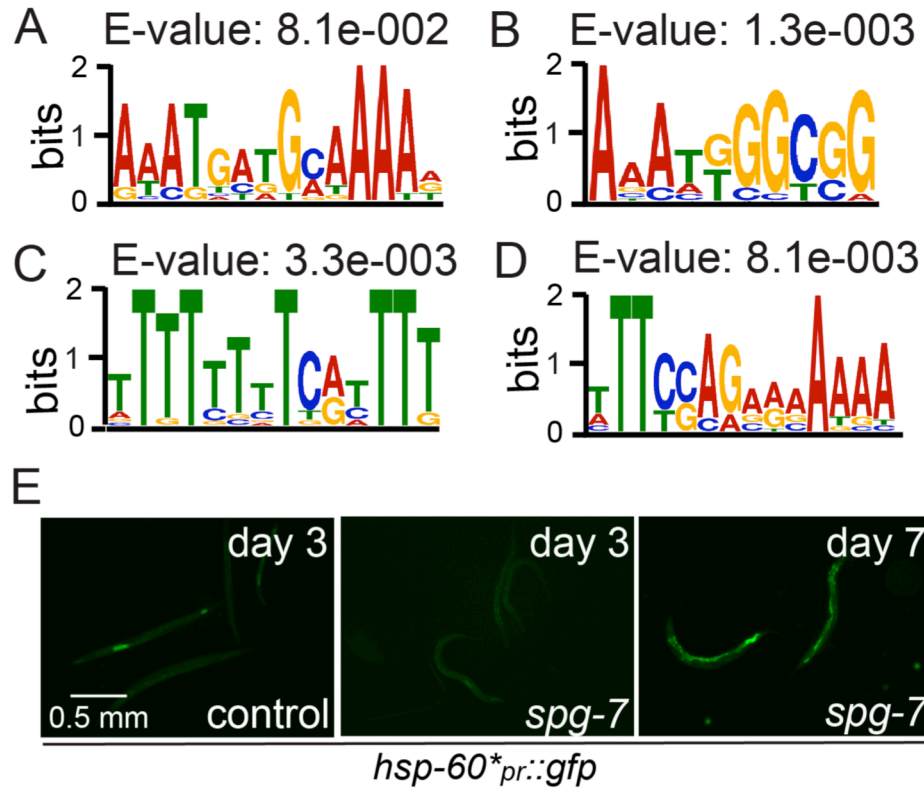

**Figure S2. Potential ATFS-1 binding sites and UPR<sup>mt</sup> regulatory elements. Related to Figure 2.**

**A-D.** Motifs enriched within the promoters of mitochondrial protective genes in the ATFS-1 bound regions as determined by ChIP-seq, obtained using MEME. The motifs are in descending order based on the enrichment (E)-value generated by MEME. It should be noted that the sequence in Figure S2A also appears in Figure 2A.

**E.** Photomicrographs of *hsp-60\*<sub>pr</sub>::gfp* transgenic worms lacking a single UPR<sup>mt</sup> worms raised on control or *spg-7*(RNAi) for 3 or 7 days. Scale bar, 0.5 mm.

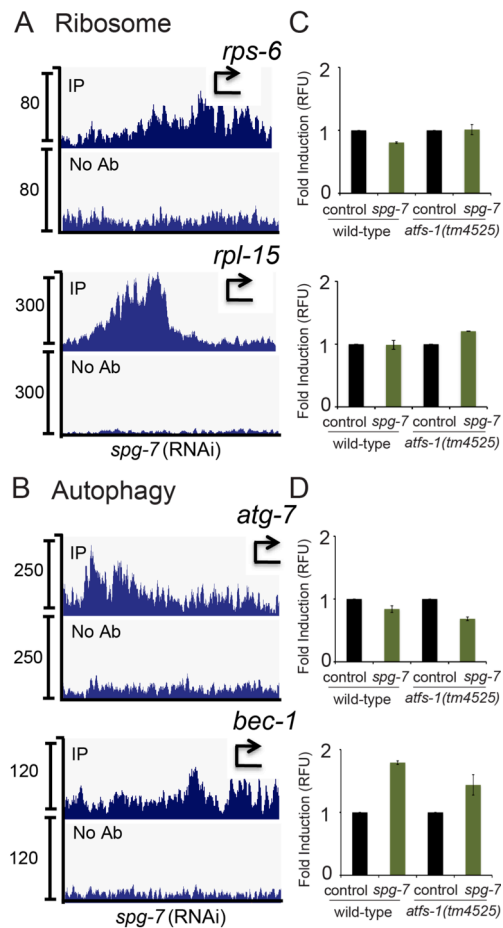

**Figure S3. ATFS-1 binds ribosome and autophagy gene promoters with no obvious effect on transcription. Related to Figure 3.**

**A-B.** ChIP-seq profiles of the *rps-6*, *rpl-15*, *atg-7* and *bec-1* promoters in wild-type worms raised on *spg-7*(RNAi), using ATFS-1-specific antibody (upper panel) or no antibody (lower panel). The y-axis is the number of sequence reads and the x-axis is approximately 2.5 kilobases with the start codon marked with an arrowhead.

**C-D.** Expression levels of *rps-6*, *rpl-15*, *atg-7* and *bec-1* mRNA in wild-type or *atfs-1(tm4525)* worms raised on control or *spg-7*(RNAi) determined by qRT-PCR (N = 3,  $\pm$  SD,  $p^*$  (student t-test) < 0.05).

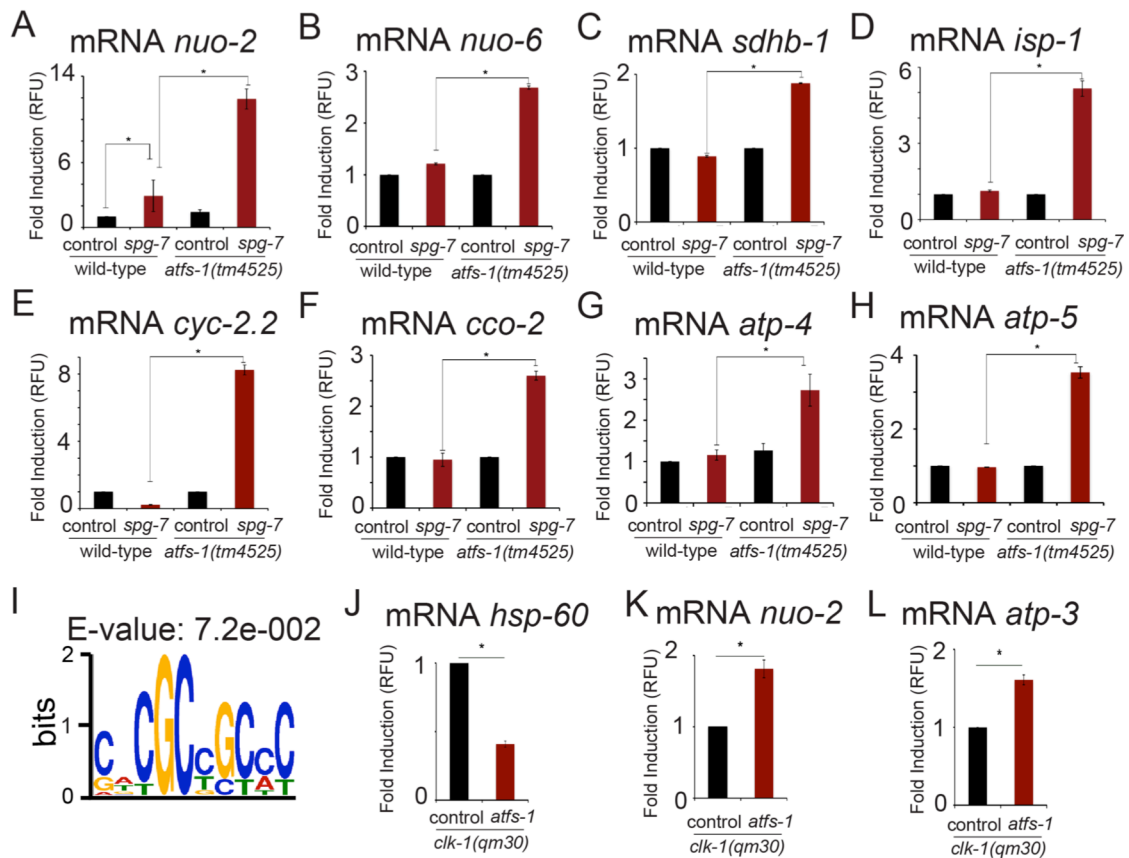

**Figure S4. ATFS-1 limits nuclear-encoded OXPPOS transcript accumulation during mitochondrial stress. Related to Figure 4.**

**A-H.** Expression levels of *nuo-2*, *nuo-6*, *sdhb-1*, *isp-1*, *cyc-2.2*, *cco-2*, *atp-4*, and *atp-5* mRNA in wild-type or *atfs-1(tm4525)* worms raised on control or *spg-7*(RNAi) determined by qRT-PCR (N = 3,  $\pm$  SD,  $p^*$  (student t-test) < 0.05).

**I.** The only significantly enriched motif found within the promoters of nuclear encoded OXPPOS and TCA cycle genes in the ATFS-1 bound regions as determined by ChiP-seq, obtained using MEME.

**J-L.** Expression levels of *hsp-60*, *nuo-2*, and *atp-3* mRNA in *clk-1(qm30)* worms raised on control or *atfs-1*(RNAi) determined by qRT-PCR (N = 3,  $\pm$  SD,  $p^*$  (student t-test) < 0.05)

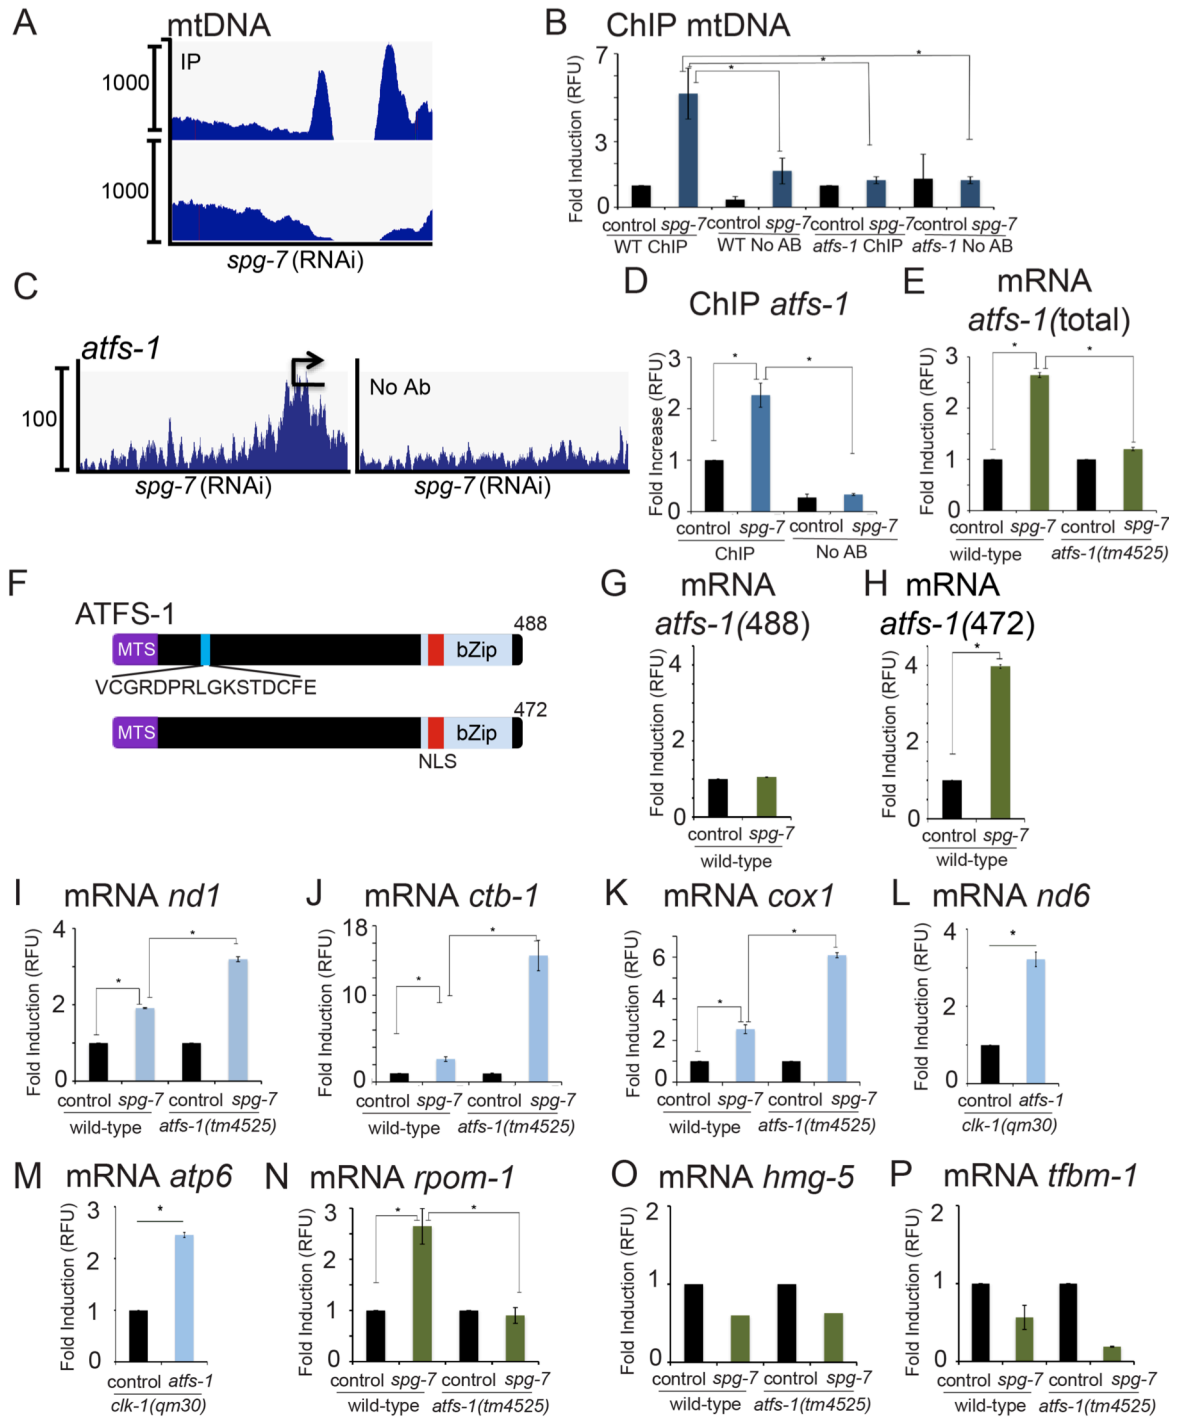

**Figure S5. ATFS-1 directly binds mtDNA and impairs mtDNA-encoded transcript accumulation. Related to Figure 5.**

**A.** ChIP-seq profiles of the mtDNA non-coding region in wild-type worms raised on *spg-7*(RNAi),

using ATFS-1-specific antibody (upper panel) or no antibody (lower panel). In this profile the CHIP-seq reads that also mapped to the *C. elegans* nuclear genome were removed. Despite the extra stringency, ATFS-1 binding is enriched in this region of the mtDNA. The y-axis is the number of sequence reads and the x-axis is approximately 0.8 kilobases including the mtDNA region lacking protein or RNA coding segments.

**B.** ATFS-1 ChIP of the mtDNA non-coding region in wild-type and *atfs-1(tm4525)* worms, raised on control or *spg-7(RNAi)*, using ATFS-1-specific antibody or no antibody (No AB) as measured by qPCR (N = 3,  $\pm$  SD,  $p^*$  (student t-test) < 0.05). These results demonstrate that the increased interaction of ATFS-1 with mtDNA during mitochondrial stress, as obtained by ChIP-qPCR, requires *spg-7(RNAi)*, ATFS-1-specific antibodies and the *atfs-1* gene.

**C.** ChIP-seq profiles of the *atfs-1* promoter in wild-type worms raised on *spg-7(RNAi)*, using ATFS-1-specific antibody (upper panel) or no antibody (lower panel). The y-axis is the number of sequence reads and the x-axis is approximately 2.5 kilobases with the start codon marked with an arrowhead.

**D.** ChIP of the *atfs-1* promoter in the presence or absence of ATFS-1-specific antibody from wild-type worms raised on control or *spg-7(RNAi)* as measured by qPCR (N = 3,  $\pm$  SD,  $p^*$  (student t-test) < 0.05).

**E.** Expression level of *atfs-1* mRNA in wild-type or *atfs-1(tm4525)* worms raised on control or *spg-7(RNAi)* determined by qRT-PCR (N = 3,  $\pm$  SD,  $p^*$  (student t-test) < 0.05).

**F.** Schematic of two ATFS-1 isoforms with the same mitochondrial targeting sequence (MTS) encoded by mRNA two splice variants. The 472 amino acid isoform lacks a 16 amino acid sequence (blue box) located near the MTS as indicated.

**G-H.** Expression level of the two *atfs-1* splice variant mRNAs depicted in Figure S5F in worms raised on control or *spg-7(RNAi)* as measured by qRT-PCR (N = 3,  $\pm$  SD,  $p^*$  (student t-test) < 0.05).

**I-K.** Expression levels of mtDNA-encoded *nd1*, *ctb-1* and *cox1* mRNA in wild-type or *atfs-*

*1(tm4525)* worms raised on control or *spg-7*(RNAi) determined by qRT-PCR (N = 3, ± SD, p\* (student t-test) < 0.05).

**L-M.** Expression levels of *nd6* and *atp6* mRNA in *clk-1(qm30)* worms raised on control or *atfs-1*(RNAi) determined by qRT-PCR (N = 3, ± SD, p\* (student t-test) < 0.05).

**N-P.** Expression levels of *rpom-1* (the mitochondrial RNA polymerase), *hmg-5* (TFAM ortholog) and *tfbm-1* mRNA in in wild-type or *atfs-1(tm4525)* worms raised on control or *spg-7*(RNAi) determined by qRT-PCR (N = 3, ± SD, p\* (student t-test) < 0.05).

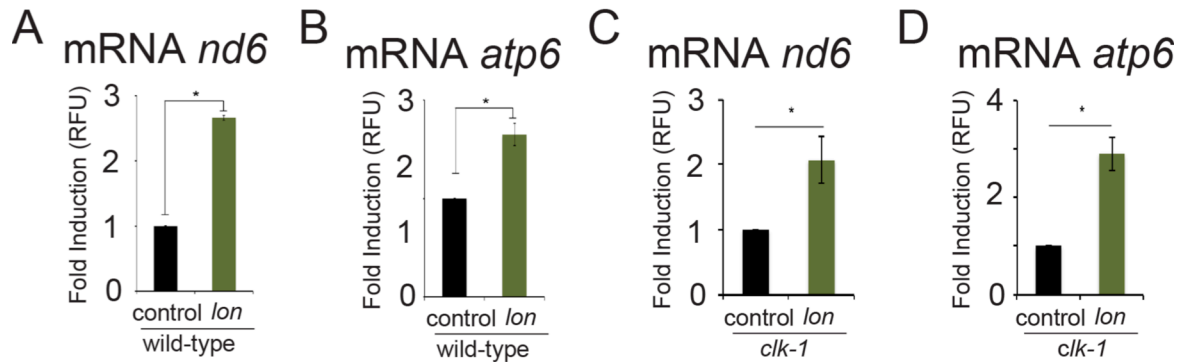

**Figure S6. *Lon* inhibition does not impair mtDNA-encoded transcript accumulation.**

**Related to Figure 7.**

**A-D.** Expression levels of *nd6* and *atp6* mRNA in wild-type and *clk-1*(*qm30*) worms raised on control or *lon*(RNAi) determined by qRT-PCR (N = 3,  $\pm$  SD,  $p^*$  (student t-test) < 0.05). While *lon*(RNAi) causes a ~55 kD species of ATFS-1 (lowest molecular weight form of ATFS-1 as observed in Figure 5E) to accumulate, the accumulation of mtDNA-encoded mRNAs is not decreased suggesting *Lon*-mediated degradation of this ATFS-1 species does not affect the regulation of mtDNA-encoded mRNAs.

**Table S1.** Promoters of genes that ATFS-1 interacted with during *spg-7*(RNAi) exposure as determined by ATFS-1 ChIP-seq.



**Table S2** . ATFS-1 directly binds and up-regulates genes during mitochondrial stress.

Related to Figure 1.

| Sequence Name                         | Gene symbol  | KOG title, protein domain or function                                                                          | Fold Enrichment<br>DNA-ChIP<br>Wild-type<br><i>spg-</i><br>7(RNAi)/control | Fold Induction<br>Transcription<br>Wild-type<br><i>spg-</i><br>7(RNAi)/control |
|---------------------------------------|--------------|----------------------------------------------------------------------------------------------------------------|----------------------------------------------------------------------------|--------------------------------------------------------------------------------|
| <b>Detoxification/stress response</b> |              |                                                                                                                |                                                                            |                                                                                |
| ZK1290.5                              |              | Aldo/keto reductase family proteins                                                                            | 4.38                                                                       | 2.83203                                                                        |
| K10D2.6                               | emb-8        | NADP/FAD dependent oxidoreductase<br>UDP-glucuronosyl and UDP-glucosyl<br>transferase                          | 4.91                                                                       | 2.38339                                                                        |
| K08B4.3                               | ugt-19       | transferase                                                                                                    | 7.54                                                                       | 26.7691                                                                        |
| AC3.8                                 | ugt-2        | UDP-GlucuronosylTransferase<br>UDP-glucuronosyl and UDP-glucosyl<br>transferase                                | 4.72                                                                       | 25.4083                                                                        |
| M88.1                                 | ugt-62       | transferase                                                                                                    | 2.6                                                                        | 11.1567                                                                        |
| F39G3.1                               | ugt-61       | UDP-glucuronosyl and UDP-glucosyl<br>transferase                                                               | 3.1                                                                        | 9.46427                                                                        |
| T07C5.1                               | ugt-50       | UDP-GlucuronosylTransferase                                                                                    | 8.97                                                                       | 5.17449                                                                        |
| R04D3.1                               | cyp-14A4     | Cytochrome P450 CYP2 subfamily                                                                                 | 2.51                                                                       | 100.474                                                                        |
| K09A11.2                              | cyp-14A1     | Cytochrome P450 CYP2 subfamily                                                                                 | 3.1                                                                        | 23.8354                                                                        |
| R08F11.3                              | cyp-33C8     | Cytochrome P450 CYP2 subfamily                                                                                 | 9.44                                                                       | 52.7502                                                                        |
| Y17D7A.4                              | cyp-33D3     | Cytochrome P450 CYP2 subfamily                                                                                 | 3.95                                                                       | 4.19634                                                                        |
| F40F8.7                               | pqm-1        | paraquat responsive                                                                                            | 2.95                                                                       | 3.752                                                                          |
| C54D10.1                              | cdr-2        | glutathione S-transferase-like protein                                                                         | 6.34                                                                       | 15.2001                                                                        |
| K01D12.11                             | cdr-4        | cadmium responsive                                                                                             | 5.9                                                                        | 11.9017                                                                        |
| F52E1.13                              |              | Oxidation resistance protein                                                                                   | 3.06                                                                       | 1.71515                                                                        |
| Y73F8A.27                             |              | Ferredoxin                                                                                                     | 4.89                                                                       | 1.86338                                                                        |
| <b>Signaling/Peptide</b>              |              |                                                                                                                |                                                                            |                                                                                |
| ZK488.2                               | nhr-90       | Nuclear Hormone Receptor family                                                                                | 3.98                                                                       | 4.64094                                                                        |
| F57G8.6                               | nhr-193      | Nuclear Hormone Receptor family                                                                                | 5.83                                                                       | 5.66826                                                                        |
| R11G11.1                              | nhr-132      | Nuclear Hormone Receptor family                                                                                | 7.48                                                                       | 3.15044                                                                        |
| R11G11.12                             | nhr-210      | Nuclear Hormone Receptor family                                                                                | 2.68                                                                       | 5.76655                                                                        |
| vhp-1                                 | vhp-1        | Dual specificity phosphatase                                                                                   | 3.05                                                                       | 2.39868                                                                        |
| F26G5.9                               | tam-1        | Predicted E3 ubiquitin ligase<br>Serine/threonine specific protein phosphatase                                 | 3.43                                                                       | 1.73396                                                                        |
| F56C9.1                               | gsp-2, kap-1 | PP1                                                                                                            | 2.62                                                                       | 4.35203                                                                        |
| <b>Transporters</b>                   |              |                                                                                                                |                                                                            |                                                                                |
| F57A10.3                              | haf-3        | ABC transporter family<br>Mitochondrial import inner membrane<br>translocase, subunit TIM23                    | 6.59                                                                       | 2.08411                                                                        |
| F15D3.7                               |              | Mitochondrial import inner membrane<br>translocase, subunit TIM17                                              | 7.57                                                                       | 2.12536                                                                        |
| E04A4.5                               |              | translocase, subunit TIM17                                                                                     | 5                                                                          | 1.9311                                                                         |
| T09F3.2                               |              | Mitochondrial carrier protein - Rim2p/Mrs12p                                                                   | 6.04                                                                       | 1.82836                                                                        |
| F25B4.7                               |              | Mitochondrial ADP/ATP carrier proteins                                                                         | 2.62                                                                       | 2.37832                                                                        |
| T28F3.4                               |              | Permease of the major facilitator superfamily<br>Synaptic vesicle transporter SVOP and related<br>transporters | 4.21                                                                       | 5.30959                                                                        |
| C46C2.2                               |              | transporters                                                                                                   | 9.01                                                                       | 2.25887                                                                        |
| C47A10.1                              | pgp-9        | Multidrug/pheromone exporter                                                                                   | 4.85                                                                       | 10.8474                                                                        |
| <b>Mitochondrial quality control</b>  |              |                                                                                                                |                                                                            |                                                                                |
| M03C11.5                              | ymel-1       | YME1-Like (Yeast Mitochondrial Escape) AAA<br>protease)                                                        | 13.08                                                                      | 1.44121                                                                        |
| F55F8.6                               | mff-2        | Mitochondrial fission factor                                                                                   | 2.98                                                                       | 6.03495                                                                        |
| T12E12.4                              | drp-1        | dynammin-related protein                                                                                       | 5.53                                                                       | 2.63286                                                                        |
| F56C11.3                              |              | Mitochondrial sulfhydryl oxidase                                                                               | 8.5                                                                        | 2.19908                                                                        |

|                                            |        |                                                                 |       |         |
|--------------------------------------------|--------|-----------------------------------------------------------------|-------|---------|
| C14F5.1                                    | dct-1  | Similarity to the mammalian BNIP3 proteins                      | 3.89  | 2.23187 |
| <b>Protein folding/degradation</b>         |        |                                                                 |       |         |
| T09B4.10                                   | chn-1  | Chaperone-dependent E3 ubiquitin protein ligase                 | 8.12  | 2.45897 |
| ZK593.6                                    | lgg-2  | Microtubule-associated anchor protein involved in autophagy     | 2.61  | 2.14331 |
| <b>Metabolism</b>                          |        |                                                                 |       |         |
| F09F7.7                                    |        | 2-Oxoglutarate- and iron-dependent dioxygenase-related proteins | 2.7   | 2.50844 |
| M28.6                                      | lact-3 | Predicted esterase                                              | 2.98  | 2.12752 |
| F15A8.6                                    |        | Carboxylesterase and related proteins                           | 2.93  | 3.59892 |
| F54D5.1                                    | pcs-1  | PhytoChelatin Synthase                                          | 5.06  | 2.67404 |
| <b>Metabolism: Ubiquinone biosynthesis</b> |        |                                                                 |       |         |
| C24A11.9                                   | coq-1  | Polyprenyl synthetase                                           | 3.74  | 3.9627  |
| <b>Metabolism: carbohydrates</b>           |        |                                                                 |       |         |
| K10B3.9                                    | mai-1  | ATPase inhibitory factor                                        | 7.5   | 3.08519 |
| K10B3.9                                    | gpd-2  | Glyceraldehyde 3 Phosphate dehydrogenase                        | 7.5   | 3.13691 |
| F13D12.2                                   | ldh-1  | Lactate dehydrogenase                                           | 7.09  | 2.64655 |
| <b>Metabolism: lipids</b>                  |        |                                                                 |       |         |
| C36A4.9                                    | acs-19 | Acyl-CoA synthetase                                             | 2.55  | 2.00316 |
| M01F1.3                                    |        | Lipoate synthase                                                | 2.88  | 1.93466 |
| <b>Orphans</b>                             |        |                                                                 |       |         |
| C06A5.7                                    | unc-94 | Tropomodulin and leiomodulin                                    | 3.19  | 1.56777 |
| B0546.4                                    |        | Predicted Yippee-type zinc-binding protein                      | 3.42  | 1.82517 |
| F58B4.5                                    |        | Predicted small molecule kinase                                 | 2.76  | 6.59003 |
| T12G3.1                                    |        | contains ZZ-type Zn-finger                                      | 4.03  | 5.74038 |
| F54F2.8                                    | prx-19 | farnesylated protein associated with peroxisomes                | 4.3   | 1.72993 |
| <b>Transcription regulators</b>            |        |                                                                 |       |         |
| ZC376.7                                    | atfs-1 | bZip transcription factor                                       | 3.62  | 1.84076 |
| T19E7.2                                    | skn-1  | bZIP transcription factor NRF1                                  | 6.69  | 1.83395 |
| W07G1.3                                    | zip-3  | bZip transcription factor                                       | 5.41  | 1.9944  |
| F40G9.11                                   | mxl-2  | HLHZip transcription factor BIGMAX                              | 4.62  | 2.00943 |
| F19B2.5                                    |        | Helicase-like transcription factor                              |       | 3.81204 |
| <b>Unknowns</b>                            |        |                                                                 |       |         |
| C49A9.6                                    |        | Uncharacterized protein with ubiquitin fold                     | 3.19  | 2.42714 |
| F15B9.10                                   |        |                                                                 | 6.34  | 1.34891 |
| Y95B8A.6                                   |        |                                                                 | 3.41  | 1.67149 |
| F22H10.2                                   |        |                                                                 | 4.88  | 7.33184 |
| C32F10.4                                   |        |                                                                 | 4.88  | 4.21816 |
| ZK470.2                                    |        |                                                                 | 9.56  | 2.13876 |
| T28B8.1                                    |        |                                                                 | 3.57  | 1.98455 |
| F26F12.3                                   |        |                                                                 | 2.46  | 1.7378  |
| H28G03.2                                   |        |                                                                 | 11.53 | 2.56769 |
| C41G7.9                                    |        |                                                                 | 3.42  | 1.99333 |
| R08E5.1                                    |        |                                                                 | 3.83  | 2.30598 |
| R102.5                                     |        |                                                                 | 4.24  | 4.2808  |
| R102.5                                     |        |                                                                 | 4.24  | 4.2808  |

**Table S3.** Pathways enriched in ChIP-Seq dataset of ATFS-1 binding during spg-7(RNAi) exposure. Related to Figure 3.

**Entrez GeneID Gene symbol KOG title, protein domain or function**

**Ribosomes**

|         |         |                                        |
|---------|---------|----------------------------------------|
| 178352  | rpl-29  | Large ribosomal subunit L29 protein    |
| 176891  | rpl-15  | Large ribosomal subunit L15 protein    |
| 173235  | rpl-31  | Large ribosomal subunit L31 protein    |
| 3564813 | M01F1.3 |                                        |
| 171853  | rpl-1   | Large ribosomal subunit L10a protein   |
| 176097  | rpl-35  | Large ribosomal subunit L35 protein    |
| 171949  | rpl-13  | Large ribosomal subunit L13 protein    |
| 177203  | rpl-7A  | Large ribosomal subunit L7A protein    |
| 172074  | rpl-4   | Large ribosomal subunit L4 protein     |
| 171602  | rpl-7   | Large ribosomal subunit L7 protein     |
| 171692  | rpl-17  | Large ribosomal subunit L17 protein    |
| 175786  | rps-12  | Small ribosomal subunit S12 protein    |
| 173342  | rps-26  | Small ribosomal subunit S26 protein    |
| 172061  | rps-10  | Small ribosomal subunit S10 protein    |
| 173260  | rps-6   | Small ribosomal subunit S6 protein     |
| 173309  | rps-20  | Small ribosomal subunit S20 protein    |
| 177481  | rps-4   | Small ribosomal subunit S4 protein     |
| 176975  | rps-28  | Small ribosomal subunit S28 protein    |
| 175413  | ubl-1   | ubiquitin like/ ribosomal protein S27a |
| 171767  | Y37E3.8 |                                        |

**Glycolysis/Gluconeogenesis**

|         |         |                                                |
|---------|---------|------------------------------------------------|
| 175500  | acs-19  | fatty Acid CoA Synthetase family               |
| 174423  | enol-1  | Enolase                                        |
| 172751  | F14B4.2 | Hexokinase                                     |
| 172376  | ipgm-1  | cofactor-independent phosphoglycerate mutase   |
| 176788  | aldo-1  | Fructose-bisphosphate aldolase 1               |
| 175827  | aldo-2  | Fructose-bisphosphate aldolase 2               |
| 3565504 | gpd-2   | GPD (glyceraldehyde 3-phosphate dehydrogenase) |
| 173227  | gpi-1   | Glucose-6-Phosphate Isomerase                  |
| 174798  | ldh-1   | Lactate DeHydrogenase                          |
| 172744  | pyk-1   | Pyruvate kinase                                |
| 179627  | sodh-1  | Sorbitol DeHydrogenase family                  |
| 174844  | tpi-1   | Triose Phosphate Isomerase                     |

**Oxidative Phosphorylation**

|        |            |                                             |
|--------|------------|---------------------------------------------|
| 177038 | Y69A2AR.18 | ATP synthase gamma chain                    |
| 172195 | atp-3      | ATP5O subunit of mitochondrial ATP synthase |
| 175716 | atp-2      | catalytic F1 portion of ATP synthase        |
| 173134 | H28O16.1   | ATP synthase alpha                          |
| 174059 | F58F12.1   | ATP16, epsilon/delta subunit                |
| 176707 | cco-2      | COX Va                                      |
| 172832 | cco-1      | COX5b                                       |
| 178404 | nuo-3      | NDUFA6                                      |
| 176001 | nuo-4      | NDUFA10                                     |
| 172734 | nduf-7     | NDUFS7                                      |
| 184827 | nduf-6     | NDUFS6                                      |
| 188912 | nduf-2.2   | NDUFS2                                      |
| 181108 | sdha-1     | Succinate DeHydrogenase complex subunit A   |
| 175038 | Y51H1A.3   | NDUFB8                                      |
| 175371 | Y54F10AM.5 | NDUFA8                                      |

**Vacuolar ATPase**

|         |        |                                      |
|---------|--------|--------------------------------------|
| 3564970 | vha-13 | vacuolar proton-translocating ATPase |
|---------|--------|--------------------------------------|

|               |                                      |
|---------------|--------------------------------------|
| 180692 vha-12 | vacuolar proton-translocating ATPase |
| 177442 vha-8  | Vacuolar H ATPase                    |
| 176383 vha-1  | Vacuolar H ATPase                    |
| 174596 vha-9  | Vacuolar H ATPase                    |
| 177017 vha-11 | Vacuolar H ATPase                    |
| 180534 vha-15 | Vacuolar H ATPase                    |

#### **TCA (Citric Acid Cycle)**

|                |                                           |
|----------------|-------------------------------------------|
| 176121 aco-2   | Aconitase                                 |
| 176437 cts-1   | Citrate Synthase                          |
| 177775 idh-1   | Isocitrate Dehydrogenase                  |
| 179041 mdh-1   | Malate dehydrogenase                      |
| 179616 pyc-1   | Pyruvate Carboxylase                      |
| 180485 D1005.1 | Probable ATP-citrate synthase             |
| 181570 sucl-1  | Succinyl-CoA Ligase, alpha subunit        |
| 181108 sdha-1  | Succinate Dehydrogenase complex subunit A |
| 179063 dlst-1  | DihydroLipoamide S-SuccinylTransferase    |

#### **Regulation of Autophagy**

|               |                                                                                                 |
|---------------|-------------------------------------------------------------------------------------------------|
| 181727 aak-2  | AMP-Activated Kinase                                                                            |
| 178005 atg-7  | AuTophagy (yeast Atg homolog)                                                                   |
| 177345 bec-1  | Beclin (human autophagy) homolog                                                                |
| 174050 lgg-1  | LC3, GABARAP and GATE-16 family                                                                 |
| 180311 unc-51 | serine/threonine protein kinase orthologous to Saccharomyces cerevisiae autophagy protein Atg1p |

**Table S4.** ATFS-1 directly interacts with some OXPHOS genes during mitochondrial stress. Related to Figure 4.

| <b>Human Name</b>                     | <b>Worm Name</b> | <b>ATFS-1 Binding</b> |
|---------------------------------------|------------------|-----------------------|
| <b>Complex I</b>                      |                  |                       |
| <b>NADH-ubiquinone oxidoreductase</b> |                  |                       |
| NDUFA5                                | C33A12.1         | NO                    |
| NDUFA6                                | Y57G11C.12       | NUO-3                 |
| NDUFA7                                | F45H10.3         | NO                    |
| NDUFA8                                | Y54F10AM.5       | YES                   |
| NDUFA9                                | Y53G8AL.2        | NO                    |
| NDUFA10                               | K04G7.4          | NUO-4                 |
| NDUFA12                               | Y94H6A.8         | NO                    |
| NDUFA13                               | C34B2.8          | NO                    |
| NDUFAB1                               | Y56A3A.19        | NO                    |
| NDUFAF1                               | C50B8.3          | NUAF-1                |
| NDUFAF2                               | Y94H6A.8         | NO                    |
| NDUFAF3                               | R07H5.3          | NUAF-3                |
| NDUFAF4                               | B0035.15         | YES                   |
| NDUFB2                                | F44G4.2          | NO                    |
| NDUFB4                                | W01A8.4          | NUO-6                 |
| NDUFB5                                | C25H3.9          | NO                    |
| NDUFB7                                | D2030.4          | NO                    |
| NDUFB8                                | Y51H1A.3         | YES                   |
| NDUFB9                                | C16A3.5          | NO                    |
| NDUFB10                               | F59C6.5          | NO                    |
| NDUFB11                               | F42G8.10         | NO                    |
| NDUFC2                                | Y71H2AM.4        | YES                   |
| NDUFS1                                | Y45G12B.1        | NUO-5                 |
| NDUFS2                                | T26A5.3          | NDUF-2.2              |
|                                       | K09A9.5          | GAS-1                 |
| NDUFS3                                | T10E9.7          | NUO-2                 |
| NDUFS4                                | ZK973.10         | NDUF-4                |
| NDUFS5                                | Y54E10BL.5       | NDUF-5                |
| NDUFS6                                | F22D6.4          | NDUF-6                |
| NDUFS7                                | W10D5.2          | NDUF-7                |
| NDUFS8                                | T20H4.5          | NO                    |
| NDUFV1                                | C09H10.3         | NUO-1                 |
| NDUFV2                                | F53F4.10         | NO                    |
| <b>Complex II</b>                     |                  |                       |
| <b>Succinate dehydrogenase</b>        |                  |                       |
| SDHA                                  | C03G5.1          | SDHA-1                |
|                                       |                  | YES                   |

|      |         |        |    |
|------|---------|--------|----|
| SDHB | F42A8.2 | SDHB-1 | NO |
| SDHC | T07C4.7 | MEV-1  | NO |
| SDHD | F33A8.5 | SDHD-1 | NO |

### Complex III

#### Cytochrome c reductase

|                                     |           |         |     |
|-------------------------------------|-----------|---------|-----|
| RIP1/Rieske Fe-S protein            | F42G8.12  | ISP-1   | NO  |
| cytochrome c                        | E04A4.7   | CYC-2.1 | YES |
| cytochrome c                        | ZC116.2   | CYC-2.2 | NO  |
| cytochrome b-c1 complex subunit 7   | T02H6.11  |         | NO  |
| cytochrome b-c1 complex subunit 6   | T27E9.2   |         | YES |
| Cytochrome b-c1 complex subunit 2   | T10B10.2  | UCR-2.2 | NO  |
| Cytochrome b-c1 complex subunit 2   | T24C4.1   | UCR-2.3 | NO  |
| Cytochrome b-c1 complex subunit 2   | VW06B3R.1 | UCR-2.1 | YES |
| Cytochrome b-c1 complex subunit 1   | F56D2.1   | UCR-1   | NO  |
| tetratricopeptide repeat protein 19 | Y54G11A.8 | DDL-3   | NO  |

### Complex IV

#### Cytochrome c oxidoreductase

|           |           |       |     |
|-----------|-----------|-------|-----|
| Co4, COX4 | W09C5.8   |       | NO  |
| COX5b     | F26E4.9   | CCO-1 | YES |
| COX Va    | Y37D8A.14 | CCO-2 | YES |
| COX Vib   | Y71H2AM.5 |       | YES |

### Complex V

#### ATP synthase

|                              |            |       |     |
|------------------------------|------------|-------|-----|
| F1 Beta subunit              | C34E10.6   | ATP-2 | YES |
| delta subunit                | F27C1.7    | ATP-3 | YES |
| ATP synthase alpha           | H28O16.1   |       | YES |
| ATP16, epsilon/delta subunit | F58F12.1   |       | YES |
| ATP15                        | ZC262.5    |       | NO  |
| gamma subunit                | Y69A2AR.18 |       | YES |
|                              | R05D3.6    |       | NO  |
|                              | F32D1.2    |       | No  |
| ATP4                         | F02E8.1    | ASB-1 | NO  |
| ATP4                         | F35G12.10  | ASB-2 | NO  |
| ATP9                         | Y82E9BR.3  |       | YES |
|                              | R04F11.2   |       | NO  |
| subunit f                    | R53.4      |       | NO  |
| subunit g, F0, ATP20         | C53B7.4    | asg-2 | NO  |
| subunit g, F0, ATP20         | K07A12.3   | asg-1 | NO  |
|                              | C05C8.1    |       | NO  |

**Table S5.** Sequences of primers used in ChIP quantitative real time PCR. Related to Experimental Procedures.

| <b>Gene</b>       | <b>Primer Sequence</b>                                                 |
|-------------------|------------------------------------------------------------------------|
| <i>mthsp-70</i>   | F: 5'-GCATCATTATTCTCCTAAAACCTTG-3'<br>R: 5'-GTGCCTGAAAGAAAATTGCATC-3'  |
| <i>ymel-1</i>     | F: 5' ATGCCGGTTTTATTTAGCCAAC 3'<br>R: 5' GAGCGAGAGTCCAGTGGAGC 3'       |
| <i>gpd-2</i>      | F: 5' GCATCATCATTTTTCAATTTTCC 3'<br>R: 5' GACGAAACATGTGCAGTAAGC 3'     |
| <i>hsp-4</i>      | F: 5' GAGTCCATCGTGGTGCCG 3'<br>R: 5' GACATCGGGTCTCGACACG 3'            |
| <i>hsp-60</i>     | F: 5'-TCTCGTGCGGCAAACCTTG-3'<br>R: 5'-ATGGCTAATTTACATCAGAATAGACT-3'    |
| <i>chrM</i>       | F: 5'-GACGGTCAATTGTGAATTGTC-3'<br>R: 5'-GCCTAGAAGCTTCCATCATGC-3'       |
| <i>hsp-70</i>     | F: 5' CGAGCATCGGGCACAATG 3'<br>R: 5' CTCGAAAATCGCTGCAGTGTG 3'          |
| <i>atfs-1</i>     | F:5' GACGGTCAATTGTGAATTGTC 3'<br>R:5' GCCTAGAAGCTTCCATCATGC 3'         |
| <i>mtDNA-ctrl</i> | F: 5'-GCCGTGAGCTATTCTAGTTATTG-3'<br>R: 5'-GCATCTTTACCTAAGTACTCAGGTC-3' |

**Table S6.** Sequences of primers used in quantitative RT real time PCR reactions. Related to Experimental Procedures.

| <b>Gene</b>       | <b>Primer Sequence</b>                                                        |
|-------------------|-------------------------------------------------------------------------------|
| <i>act-3</i>      | F: 5'-ATCCGTAAGGACTTGTACGCCAAC-3'<br>R: 5'-CGATGATCTTGATCTTCATGGTTC-3'        |
| <i>mthsp-70</i>   | F: 5'-GAAGATACGAAGACCCAGAGGTTTC-3'<br>R: 5'-CAACCTGAGATGGGGAATACACT-3'        |
| <i>yme-1</i>      | F: 5'-GCTGGATCAGAATTTGATGAAGTAC-3'<br>R: 5'-ACTGAATCGATTTCGTCGATG-3'          |
| <i>gpd-2</i>      | F: 5'-TGAAATCCAATGGGGAGCCTC-3'<br>R: 5'-GGAGCAGAGATGATGACCTTCTTG-3'           |
| <i>hsp-4</i>      | F: 5' GAGTTGAAATCATCGCCAACG 3'<br>R: 5' GTCGCTCTCCTTGATCTCCG 3'               |
| <i>hsp-60</i>     | F: 5'-AGGGATTCGAGAGCATTCTGCAAG-3'<br>R: 5'-TGTGGCGACTTGAGCGATCTCTTC-3'        |
| <i>dnj-10</i>     | F: 5'-GCGGGCTCATTTCATCGATCTGTAC-3'<br>R: 5'-CAGATTTTTTGTGACACCCAAAG-3'        |
| <i>drp-1</i>      | F: 5'-TGGATTCCTTGGATTATTCGGC-3'<br>R: 5'-AGTTGCGTCTCTGGCACTTCTG-3'            |
| <i>timm-17</i>    | F: 5'-GATTGTTGTCTTGTGCGCCATCC-3'<br>R: 5'-ATCACCTTTGGTCCTGAACGG-3'            |
| <i>timm-23</i>    | F: 5'-CAACTGAAATCTGCTGGAGTAGGAG-3'<br>R: 5'-GGCATAATGTATTGCGGCTGC-3'          |
| <i>skn-1</i>      | F: 5'-TCCACCAGCATCTCCATTCG-3<br>R: 5'-CTCCATAGCACATCAATCAAGTCG-3'             |
| <i>enol-1</i>     | F :5' GCAGTTCCATCTGGAGCTTCTACTG 3'<br>R :5' GTTGATGTTGAGACGGCCTTG 3'          |
| <i>ldh-1</i>      | F :5' GATAAGTTGAAGGGAGAGATGATG 3'<br>R :5' GACGAGCACCTGCTGTCACTAC 3'          |
| <i>rps-6</i>      | F :5' GTCGCCATCGATGCTCTCG 3'<br>R :5' CTTCAATGGGAATCCCTGCTTG 3'               |
| <i>rpl-15</i>     | F :5' CGTGCCAAGCAAGGATTTCG 3'<br>R :5' GTAGGTTTGTCCCTTGCACTG 3'               |
| <i>nuo-3</i>      | F: 5' GGACATCTCACCGATGTTTCG 3'<br>R: 5' GCGTAACGGATCGATTTTCATG 3'             |
| <i>Y69A2AR.18</i> | F :5' GCTTGTGTCTCAAGGCTTCG 3'<br>R :5' GGATTTGGTGATCTTTGGATG 3'               |
| <i>aco-2</i>      | 5' GAGCCACTTGGCTGGACCTG 3'<br>5' GTACGACTTCGGCTCGAATTTACTG 3'                 |
| <i>cts-1</i>      | 5' GCTATTCGCAGACTTATCACCAAG 3'<br>5' TGTGGGCTGGGATCTTCTTG 3'                  |
| <i>atg-7</i>      | F:5' GCTCAATGATTGGAACTCGATGAG 3'<br>R:5' GCTCAAACGTGCGTAACTTAAGGATAGATG 3'    |
| <i>bec-1</i>      | F :5' GATTCAGCGGATTCCGAG 3'<br>R :5' GCTTCATGAGGTTTCGAGAATG 3'                |
| ND6               | F: 5'-AGATGAGATTTATTGGGTATTTCTAG-3'<br>R: 5'-CACCTAGACGATTAGTTAATGCTG-3'      |
| CO II             | F: 5'-GTAGTTTATTGTTGGGAGTTTATG-3'<br>R: 5'-CACAATAATTCACCAAACGATACTC-3'       |
| ATP6              | F: 5'-GTAGTTCATACCCTCGTTATCGTTATG-3'<br>R: 5'-CTGCGTAAAAACACAATATAATTAAGAG-3' |
| <i>ctb-1</i>      | F: 5'-GCCGTGAGCTATTCTAGTTATTG-3'<br>R: 5'-GCATCTTTACCTAAGTACTCAGGTC-3'        |
| <i>atfs-1</i>     | F: 5'-CAATCACCATCAAAATCGGCG-3'<br>R: 5'-CTTGCTCAATGTCCATTTGCAAC-3'            |



|                     |                                                                            |
|---------------------|----------------------------------------------------------------------------|
| <i>atfs-1 (488)</i> | F: 5'-GCGGCAGAGATCCTAGATTGG-3'<br>R: 5'-CACTGCTACCATTCTGCCATG-3'           |
| <i>atfs-1 (472)</i> | F :5' ACGTGACGCTGGAAGCATG 3'<br>R :5' GCGGCTGCTGACATGTCTG 3'               |
| <i>nd-1</i>         | F: 5' -AGCGTCATTT ATTGGGAAGAAGAC-3'<br>R: 5' -AAGCTTGTGCTAATCCCATAAATGT-3' |
| CO I                | F: 5'-GCAGCAGGGTTAAGATCTATCTTAG-3'<br>R: 5'-CTGTTACAAATACAGTTCAAACAAAT-3'  |
| <i>rpom-1</i>       | F: 5'-TGGGAAGAGATAATGAGGGTGGAG-3'<br>R: 5'-CTTGTTGCCGTTTTTGCTCG-3'         |
| <i>hmg-5</i>        | F: 5'-AGTGGAAGGCATTGAGTATCTCTG-3'<br>R: 5'-GTCATCCAGCTTTTGAGCATTG-3'       |
| <i>tfbm-1</i>       | F: 5'-CTACCTGCAATGCATGTCATTG-3'<br>R: 5'-CGTCGGTATGACATGTCACG-3'           |
| <i>nuo-4</i>        | F: 5'-CAAGGAGTTGTGCTCGAACG-3'<br>R: 5'-GTAGTTGAGGAAGAGCATTTTTACG-3'        |
| <i>sdha-1</i>       | F: 5'-TTACCAGCGTGCTTTCGGAG-3'<br>R: 5'-AGGGTGTGGAGAAGAGAATGACC-3'          |
| <i>ucr-2.1</i>      | F: 5'-CGCGCCCATCTGGAAGT-3'<br>R: 5'-GAACTCCAGCAGATTTGGCTG-3'               |
| <i>cyc-2.1</i>      | F: 5'-CGGAGTTATCGGACGTACATCAG-3'<br>R: 5'-GTCTCGCGGGTCCAGACG-3'            |
| <i>cco-1</i>        | F: 5'-GCTGGAGATGATCGTTACGAG-3'<br>R: 5'-GCATCCAATGATTCTGAAGTCG-3'          |
| <i>atp-3</i>        | F: 5'-GTCCTCGACCCAAGTCTCAAG-3'<br>R: 5'-GTCCAAGGAAGTTTCCAGTCTC-3'          |
| <i>nuo-2</i>        | F: 5'-TCTGCTCTGAATGATGTGCTGG-3'<br>R: 5'-CCGTTCTTGCCAATGAGGAATC-3'         |
| <i>nuo-6</i>        | F: 5'-CTGCCAGGACATGAATACAATCTGAG-3'<br>R: 5'-GCTATGAGGATCGTATTCACGACG-3'   |
| <i>sdhb-1</i>       | F: 5'-GCTGAACGTGATCGTCTTGATG-3'<br>R: 5' GTAGGATGGGCATGACGTGG-3'           |
| <i>isp-1</i>        | F: 5'-GCAGAAAGATGAATGGTCCGTTG-3'<br>R: 5'-ATCCGTGACAAGGGCAGTAATAAC-3'      |
| <i>cyc-2.2</i>      | F: 5'-CGACTATTTGGCTGATCC- 3'<br>R: 5'-GATCAGCTCGTTCGTCAGC-3'               |
| <i>cco-2</i>        | F: 5'-GTGATACCGTCTACGCCTACATTG-3'<br>R: 5'-GCTCTGGCACGAAGAATTCTG-3'        |
| <i>atp-4</i>        | F: 5'-AGCTCGCCAACGCCGATG-3'<br>R: 5'-GAGCGGATTGAACTGCAGAGTC-3'             |
| <i>atp-5</i>        | F: 5'-CAAGGTCGCTGATGGACTTCAG-3'<br>R: 5'-GCTGACGATCGAAATGTTCAACTG-3'       |
| <i>nuaf-1</i>       | F: 5'-GAGACATAACGAGGCTCGTGTTG-3'<br>R: 5'-GAAGCCTTCTTTCCAATCACTATCG-3'     |
| <i>lpd-8</i>        | F: 5'-GTCAACAGCTTCTCCCAGACG-3'<br>F: 5'-GCTTCACTCCGTCGACTCG-3'             |
| Y17G9B.5            | F: 5'-GTGCAGTGAAGTTCTAGATGAAATG-3'<br>F: 5' CTTTGGCATCCAATAGAGCATACG-3'    |

**Primers to measure mitochondrial DNA content**

|              |                                                                            |
|--------------|----------------------------------------------------------------------------|
| <i>ND-1</i>  | F: 5' -AGCGTCATTT ATTGGGAAGAAGAC-3'<br>R: 5' -AAGCTTGTGCTAATCCCATAAATGT-3' |
| <i>act-3</i> | F: 5'-TGCGACATTGATATCCGTAAGG-3'<br>R: 5'-GGTGGTTCTCCGAAAGAA-3'             |

**Table S7.** Sequences of primers that were annealed and used in the EMSA experiments. Related to Experimental Procedures.

|                  |                                                                                                        |
|------------------|--------------------------------------------------------------------------------------------------------|
| Wild-type        | F: 5'-ATTTATATTATAAATATGATGAAGTACTAAAAAAAAGATG-3'<br>R: 5'-CATCTTTTTTTTAGTACTTCATCATATTTATAATATAAAT-3' |
| scrambled UPRmtE | F: 5'-ATTTATATTATAAATGAAGTAATGTACTAAAAAAAAGATG-3'<br>R: 5'-CATCTTTTTTTTAGTACATTACTTCATTTATAATATAAAT-3' |
